# Supplementary material for: CLL-Derived Extracellular Vesicles Impair T-Cell Activation and Foster T-Cell Exhaustion via Multiple Immunological Checkpoints
Source: MDPI journal article supplement (doi:10.3390/cells11142176), 2022-07-12
Supplement: s1 [file s1]

Suppl. Figure S1

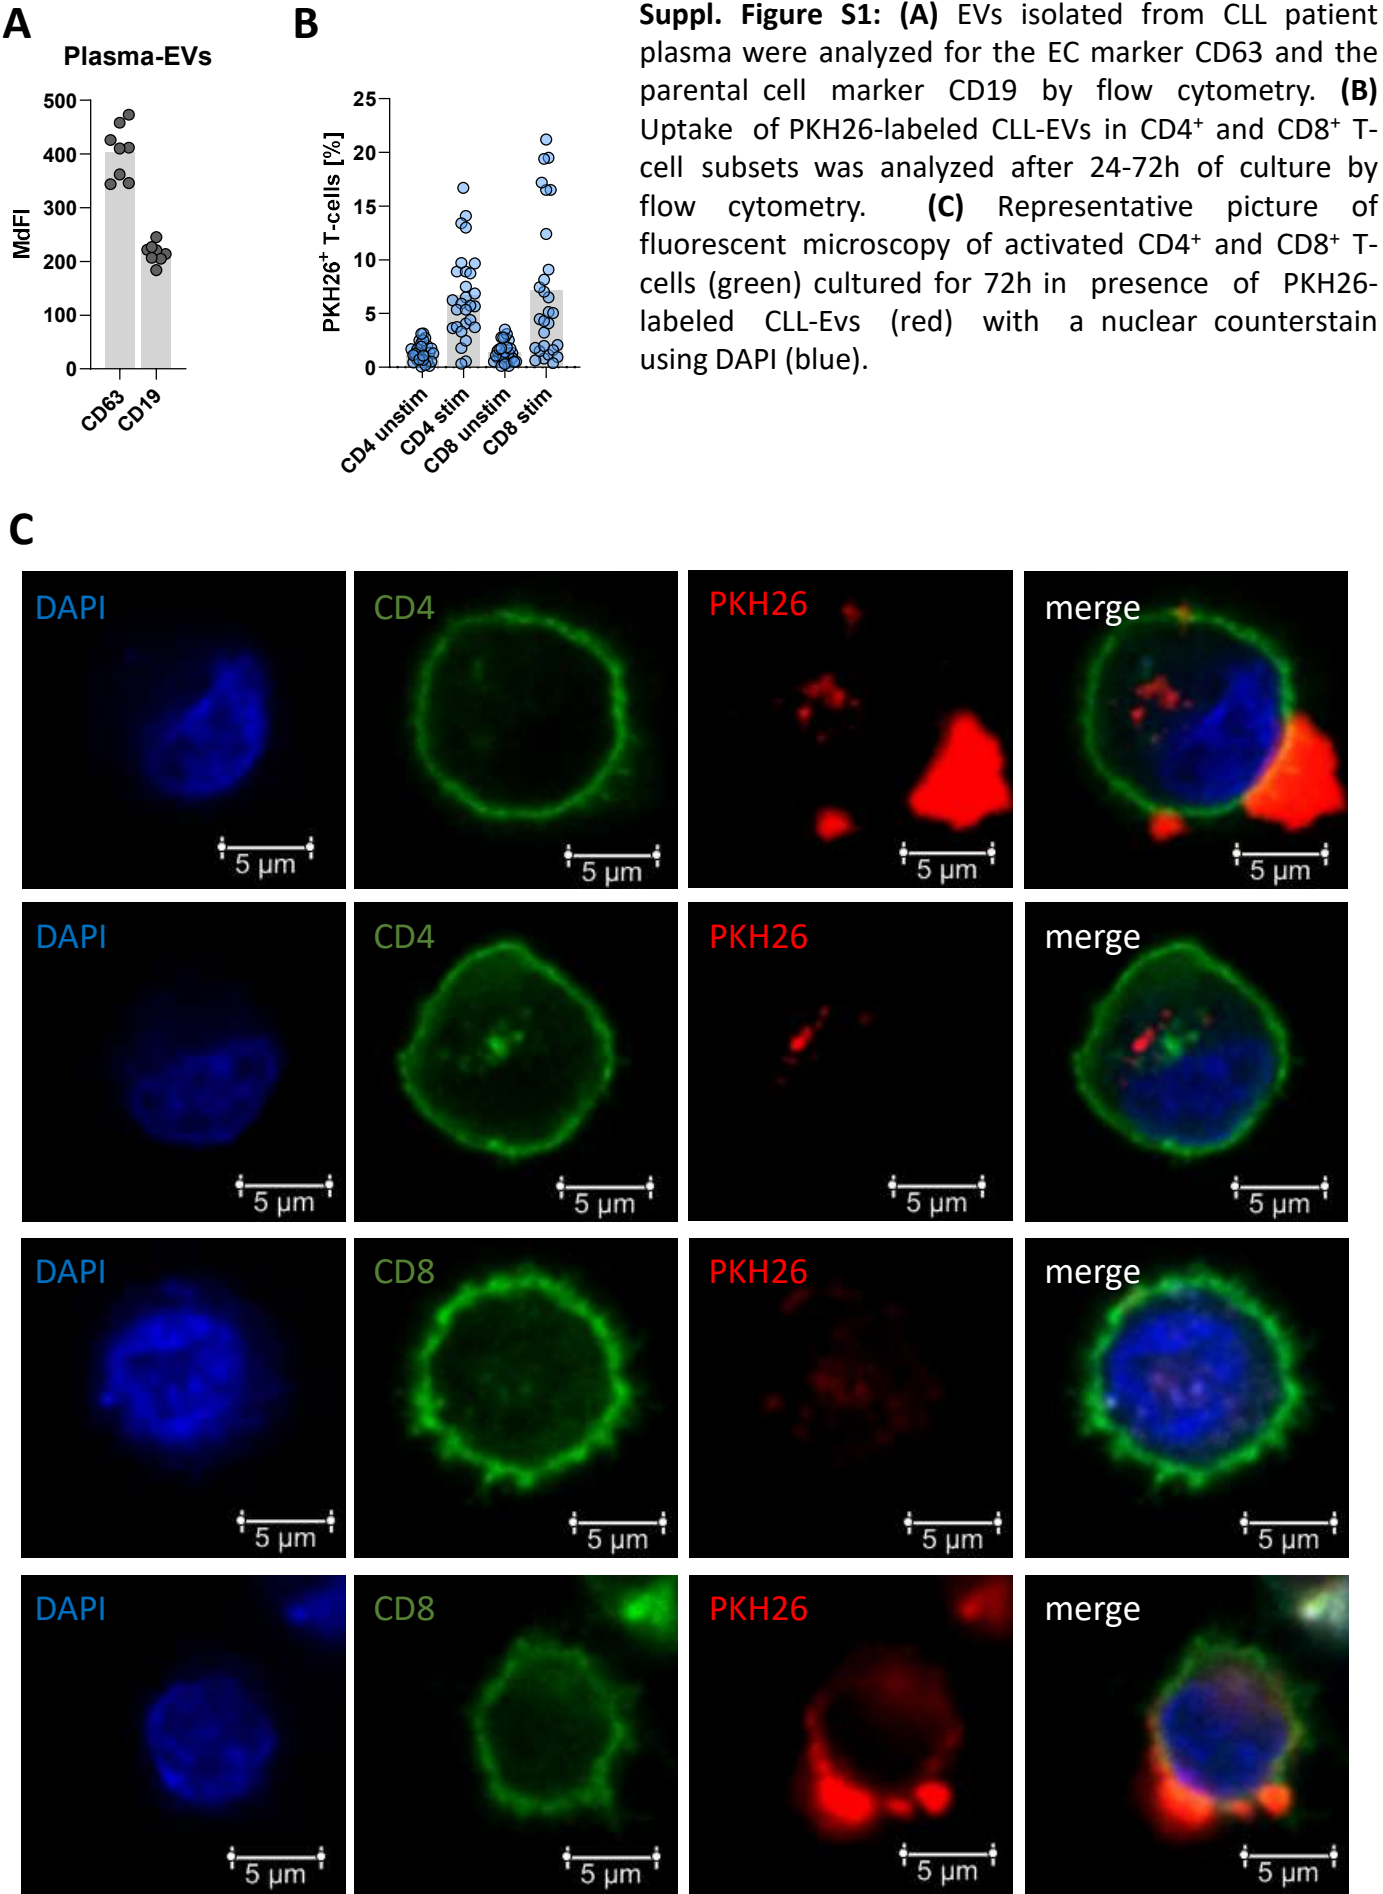

## Suppl. Figure S2

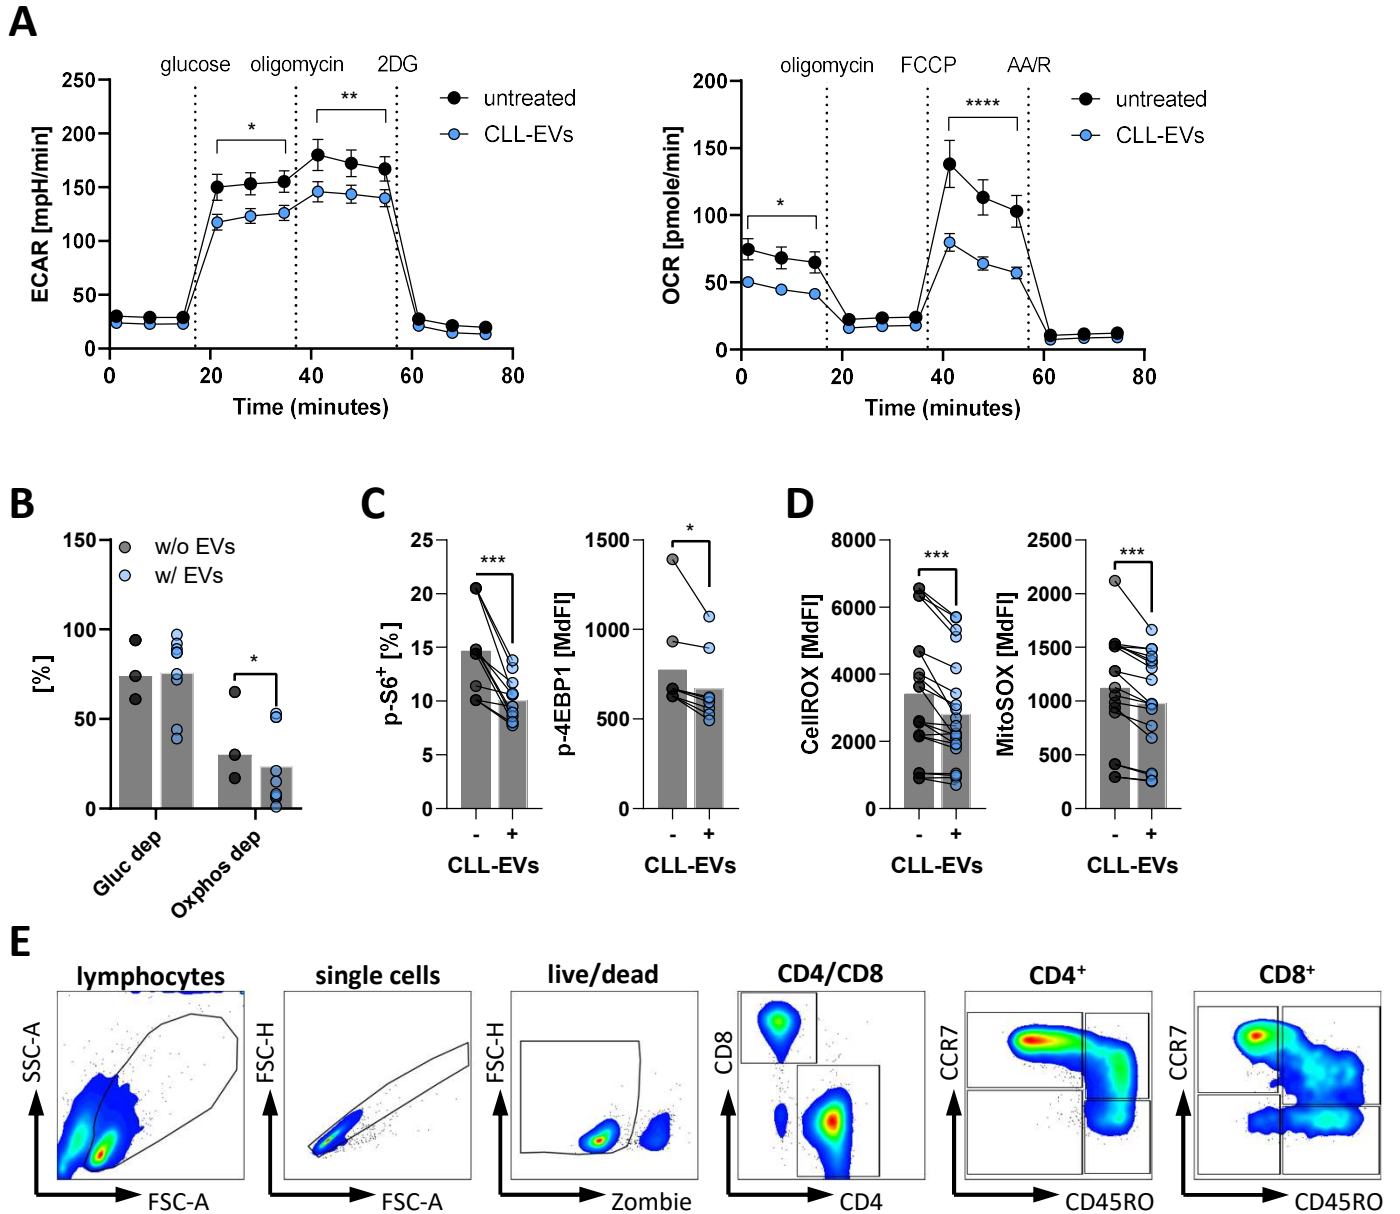

**Suppl. Figure S2:** (A) Bioenergetic kinetics of HD-derived, activated T-cells cultured in absence/presence of CLL-EVs for 72h were measured by a glycolysis stress test (left, n=3) and a mitochondrial stress test (right, n=3) using sequential injection of metabolically active inhibitors as described in materials and methods. (B) Quantification of glucose and oxphos dependency of activated T-cells cultured in absence/presence of CLL-EVs for 72h was measured by Scenith (n=9). (C) mTOR downstream signaling (phospho-S6, n=12; phospho-4EBP1, n=8) was analyzed by PhosFlow in activated T-cells cultured for 24h in absence/presence of CLL-EVs. (D) Cellular ROS levels (CellROX, n=20) and mitochondrial superoxides (MitoSOX, n=18) were analyzed by flow cytometry in activated T-cells cultured for 72h in absence/presence of CLL-EVs. (E) Gating strategy of naïve, central memory, effector memory, and terminally differentiated effector T-cells within the CD4<sup>+</sup> and CD8<sup>+</sup> compartment. Error bars show the standard error mean. \* p<0.05, \*\* p<0.01, \*\*\* p<0.001, \*\*\*\* p<0.0001. MdfI: median fluorescence intensity.

## Suppl. Figure S3 – human CART-cell product

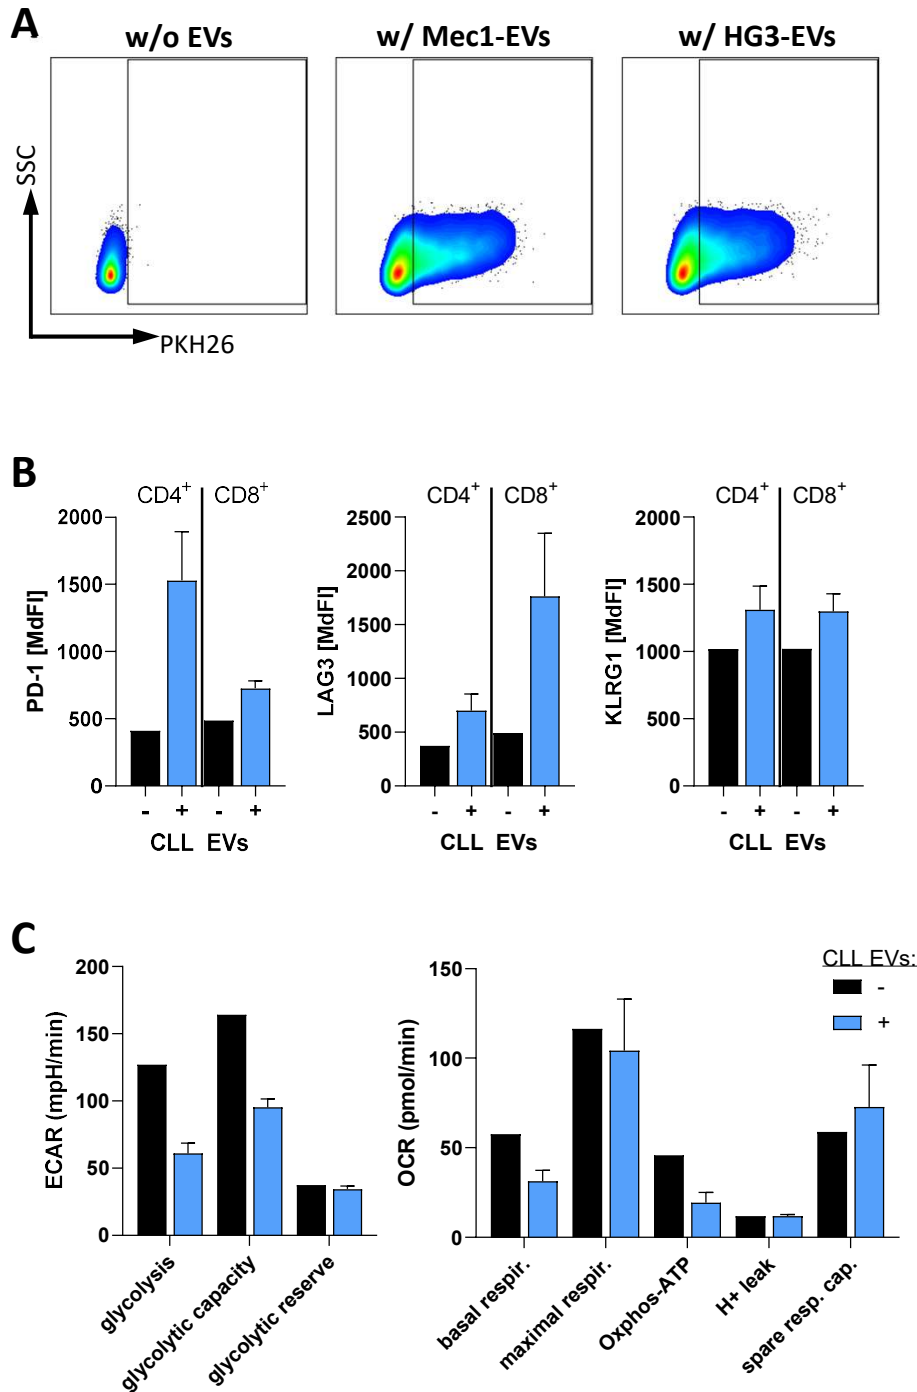

**Suppl. Figure S3:** **(A)** Representative dot plots of CART-cells incubated in absence (w/o EVs) or presence (w/ EVs) of PKH26-labeled CLL-EVs for 24h. **(B)** Surface expression of exhaustion markers was measured on CD4<sup>+</sup> and CD8<sup>+</sup> CART-cells cultured in absence/presence of CLL-EVs for 72h. **(C)** Bioenergetics of CART-cells cultured for 72h in absence/presence of CLL-EVs was analyzed on a Seahorse XFe96 and calculated using the Wave software. Error bars show the standard error mean. MFI: median fluorescence intensity.

## Suppl. Figure S4 – Immune checkpoints on CLL-EVs

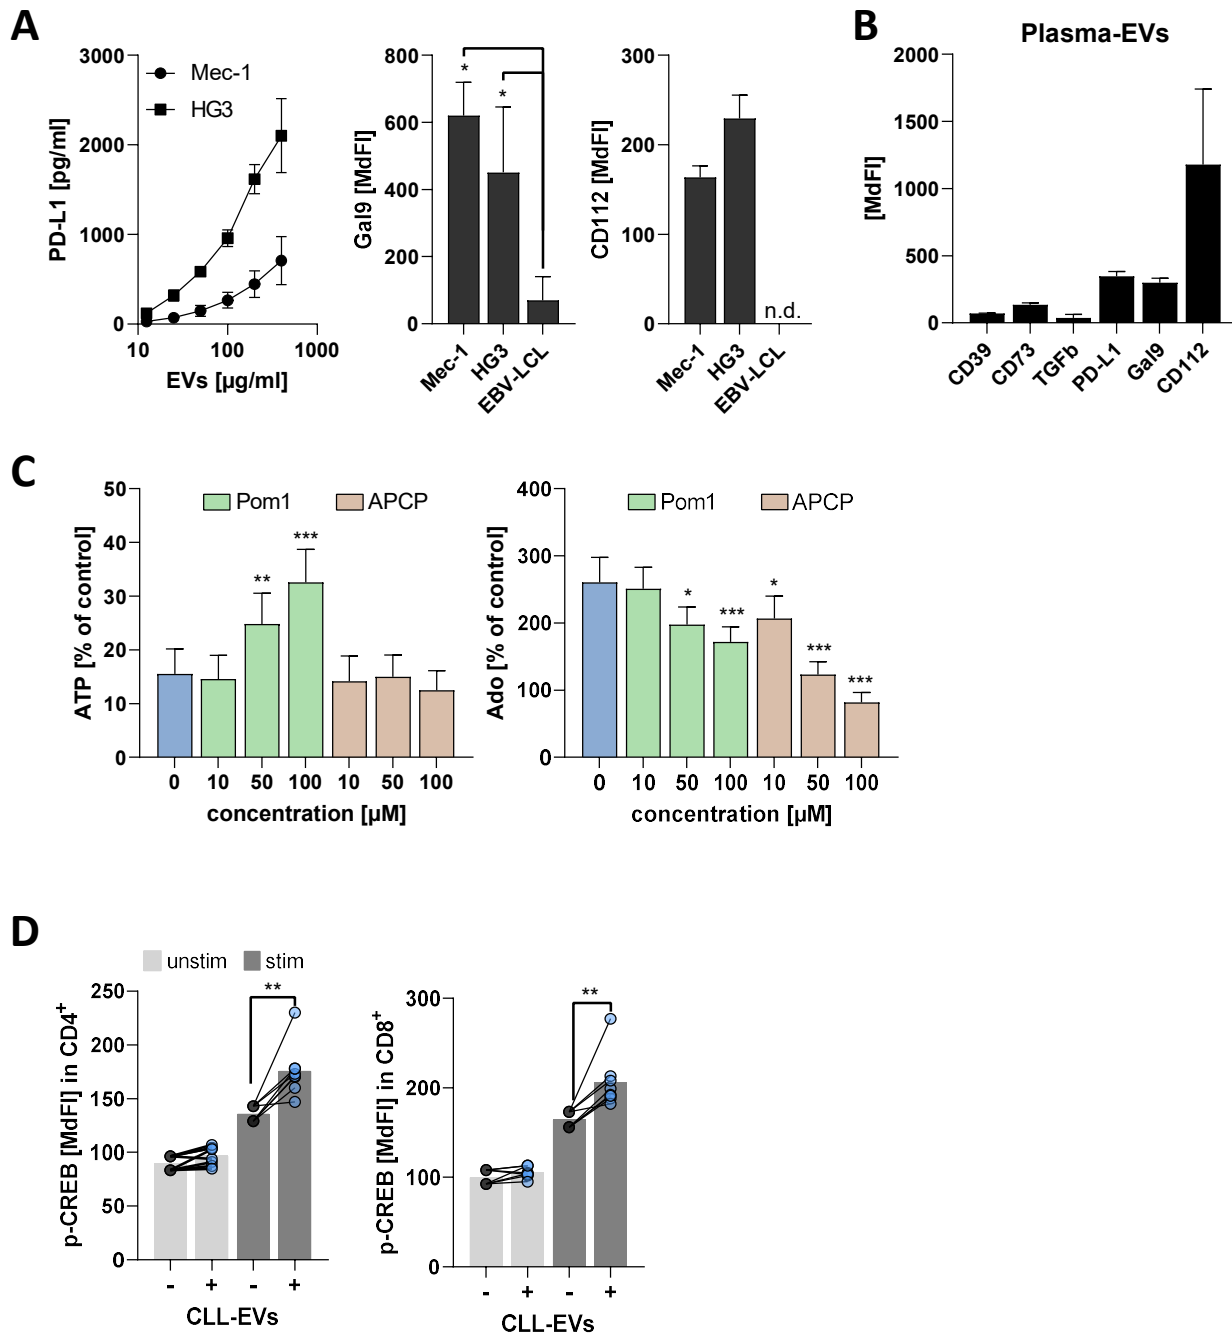

**Suppl. Figure S4:** (A) PD-L1 levels were determined on increasing concentrations of CLL-EVs using a commercial PD-L1 ELISA (Human PD-L1 [28-8] SimpleStep ELISA®Kit, abcam) according to the manufacturer's recommendations (n=3). The immune checkpoints Gal9 (n=4) and CD112 (n=5) were analyzed on CLL-EVs compared to EBV-LCL-EVs by flow cytometry using latex beads as described in materials and methods. (B) Immune checkpoints were analyzed on EVs isolated from CLL patient plasma by flow cytometry using latex beads as described in materials and methods (n=3). (C) ATP consumption and adenosine production by EVs from CLL cell lines were analyzed using an enzymatic assay and compared in relation to a control without EVs (PBS, set as 100%) upon increasing concentrations of the CD39 inhibitor POM1 and the CD73 inhibitor APCP (n=8). (D) CREB signaling was analyzed by PhosFlow in activated CD4<sup>+</sup> and CD8<sup>+</sup> T-cells cultured for 24h in absence/presence of CLL-EVs (n=8). Error bars show the standard error mean. \* p<0.05, \*\* p<0.01, \*\*\* p<0.001, n.d. not detectable. MdfI: median fluorescence intensity.
