# Supplementary material for: CLL-Derived Extracellular Vesicles Impair T-Cell Activation and Foster T-Cell Exhaustion via Multiple Immunological Checkpoints
Source: MDPI journal article supplement (doi:10.3390/cells11142176), 2022-07-12
Supplement: s1 [file s1]

**Supplemental Table S1: Inhibitors**

| Compound       | Manufacturer     | Order No. | Concentration  |
|----------------|------------------|-----------|----------------|
| APCP           | Tocris           | 3633      | 10-100 $\mu$ M |
| Cytochalasin D | Cayman Chemicals | 11330     | 5 $\mu$ M      |
| Dynasore       | Cayman Chemicals | 14062     | 20 $\mu$ M     |
| EIPA           | Cayman Chemicals | 14406     | 20 $\mu$ M     |
| GW4869         | Selleckchem      | S7609     | 10 $\mu$ M     |
| Heparin        | Sigma-Aldrich    | H3149     | 10 $\mu$ g/mL  |
| Nexinhib20     | Tocris           | 6089      | 6 $\mu$ M      |
| POM 1          | Tocris           | 2689      | 10-100 $\mu$ M |
| ZM241385       | Selleckchem      | S8105     | 30 $\mu$ M     |

**Supplemental Table S2: Fluorochrome-conjugated antibodies**

| Antibody       | Clone      | Manufacturer             |
|----------------|------------|--------------------------|
| CD4            | OKT4       | Biolegend                |
| CD8            | RPA-T8     | Biolegend                |
| CD25           | M-A251     | BD Biosciences           |
| CD25           | BC96       | Biolegend                |
| CD36           | REA760     | Miltenyi biotec          |
| CD39           | A1         | Biolegend                |
| CD45RO         | UCHL1      | Biolegend                |
| CD49b          | eBioY418   | ThermoFischer Scientific |
| CD57           | HCD57      | Biolegend                |
| CD62L          | DREG-56    | Biolegend                |
| CD73           | AD2        | Biolegend                |
| CD112          | TX31       | Biolegend                |
| CD137          | 4B4-1      | Biolegend                |
| CD152 (CTLA-4) | L3D10      | Biolegend                |
| CD154 (CD40L)  | 24-31      | Biolegend                |
| CD223 (LAG3)   | 11C3C65    | Biolegend                |
| CD274 (PD-L1)  | 29E.2A3    | Biolegend                |
| CD279 (PD-1)   | EH12.2H7   | Biolegend                |
| FoxP3          | 206D       | Biolegend                |
| Galectin-9     | 9M1-3      | Biolegend                |
| GLUT1          | 202915     | R&D Systems              |
| GLUT3          | 202017     | R&D Systems              |
| Granzyme B     | GB11       | Biolegend                |
| IFN $\gamma$   | 4S.B3      | Biolegend                |
| Ki67           | Ki67       | Biolegend                |
| KLRG1          | 14C2A07    | Biolegend                |
| p-4EBP1        | M31-16     | BD Bioscience            |
| p-AKT          | M89-61     | BD Bioscience            |
| p-AMPK         | polyclonal | Biorbyt                  |
| p-CREB         | J151-21    | BDBioscience             |
| p-mTOR         | O21-404    | BD Bioscience            |
| p-S6           | N7-548     | BD Bioscience            |
| Puromycin      | 12D10      | Sigma Aldrich            |
| TGF $\beta$    | CH6-17E5.1 | Miltenyi biotec          |

All conjugated antibodies were used at the manufacturers' recommended dilutions.
